# Supplementary material for: Proliferation of Hydroelectric Dams in the Andean Amazon and Implications for Andes-Amazon Connectivity
Source: PLoS One. 2012 Apr 18;7(4):e35126. doi: 10.1371/journal.pone.0035126 (PMC3329437; doi:10.1371/journal.pone.0035126)
Supplement: Table S2 — Ecological Systems and Ecoregions of all planned dams considered in the study. (XLS) [file pone.0035126.s011.xls]

## Sheet: Sheet1
Project	Ecological System	Ecological System Code	Ecoregion
EL YATA	Bosque inundable y vegetacion riparia de aguas mixtas de la Amazonia	CES408.571	Southwest Amazon moist forests
TAHUAMANU	Complejo de vegetacion sucesional riparia de aguas blancas de la Amazonia	CES408.550	Southwest Amazon moist forests
Pachalaca	Bosque basimontano pluviestacional subhumedo de Yungas del sur	CES409.053	Bolivian Yungas
MISICUNI	Pajonal arbustivo altoandino y altimontano pluviestacional de Yungas	CES409.059	Central Andean puna
MIGUILLAS	Bosque basimontano xerico de Yungas del sur	CES409.056	Bolivian montane dry forests
ROSITAS	Bosque freatofilo subandino interandino Boliviano-Tucumano	CES409.196	Dry Chaco
CACHUELA ESPERANZA	Bosque bajo esclerofilo de arenas blancas del centro sur de la Amazonia	CES408.584	Southwest Amazon moist forests
ANGOSTO DEL BALA	Bosque siempreverde estacional subandino del suroeste de Amazonia	CES408.545	Bolivian Yungas
RIO MADERA		N/A	Southwest Amazon moist forests
Mitu	Bosque siempreverde de tierras bajas de Guayana Occidental	CES404.355	Purus varzeá
Andaqui	Bosque inundable de la llanura aluvial de rios de aguas blancas del oeste de la Amazonia	CES408.532	Napo moist forests
Mayaicu	Bosque siempreverde subandino del oeste de Amazonia	CES408.565	Eastern Cordillera real montane forests
Nanguipa	Areas intervenidas	Areas intervenidas	Eastern Cordillera real montane forests
Chorrillos	Areas intervenidas	Areas intervenidas	Eastern Cordillera real montane forests
Ambato	Areas intervenidas	Areas intervenidas	Eastern Cordillera real montane forests
Sardinas	Areas intervenidas	Areas intervenidas	Eastern Cordillera real montane forests
Huarhualla	Areas intervenidas	Areas intervenidas	Eastern Cordillera real montane forests
Collay	Areas intervenidas	Areas intervenidas	Eastern Cordillera real montane forests
Tomebamba	Areas intervenidas	Areas intervenidas	Eastern Cordillera real montane forests
Cebadas	Pajonal altimontano y montano paramuno	CES409.123	Eastern Cordillera real montane forests
Chinchipe	Areas intervenidas	Areas intervenidas	Eastern Cordillera real montane forests
Río Verde Chico	Areas intervenidas	Areas intervenidas	Eastern Cordillera real montane forests
Victoria-Quijos	Pajonal altimontano y montano paramuno	CES409.123	Eastern Cordillera real montane forests
Jondachi-Sardinas	Bosque siempreverde subandino del oeste de Amazonia	CES408.565	Eastern Cordillera real montane forests
Chambo	Arbustal montano xerico internadino de los Andes del Norte	CES409.120	Eastern Cordillera real montane forests
Shincata	Areas intervenidas	Areas intervenidas	Eastern Cordillera real montane forests
Puela 2	Areas intervenidas	Areas intervenidas	Eastern Cordillera real montane forests
Bombuscara	Bosque siempreverde subandino del oeste de Amazonia	CES408.565	Eastern Cordillera real montane forests
Palanda	Areas intervenidas	Areas intervenidas	Eastern Cordillera real montane forests
Jondachi-La Merced	Areas intervenidas	Areas intervenidas	Eastern Cordillera real montane forests
Fátima	Areas intervenidas	Areas intervenidas	Eastern Cordillera real montane forests
Mazar-Dudas-Llavircay	Areas intervenidas	Areas intervenidas	Eastern Cordillera real montane forests
Misahualli 2	Bosque siempreverde subandino del oeste de Amazonia	CES408.565	Eastern Cordillera real montane forests
Topo	Areas intervenidas	Areas intervenidas	Eastern Cordillera real montane forests
Valldolid	Areas intervenidas	Areas intervenidas	Eastern Cordillera real montane forests
Due	Bosque siempreverde subandino del oeste de Amazonia	CES408.565	Eastern Cordillera real montane forests
Chingual	Areas intervenidas	Areas intervenidas	Eastern Cordillera real montane forests
Langoa	Areas intervenidas	Areas intervenidas	Eastern Cordillera real montane forests
Cosanga	Areas intervenidas	Areas intervenidas	Eastern Cordillera real montane forests
Llanganates	Areas Intervenidas	100	Napo moist forests
Soldados Yanuncay-Minas	Areas intervenidas	Areas intervenidas	Eastern Cordillera real montane forests
Sabanilla	Bosque altimontano Norte-Andino siempreverde	CES409.105	Eastern Cordillera real montane forests
Hidrogen	Bosque montano pluvial de los Andes del Norte	CES409.110	Eastern Cordillera real montane forests
Sucua	Areas intervenidas	Areas intervenidas	Eastern Cordillera real montane forests
Numbala	Bosque montano pluvial de los Andes del Norte	CES409.110	Eastern Cordillera real montane forests
La Barquilla	Areas intervenidas	Areas intervenidas	Eastern Cordillera real montane forests
Cuyes	Areas intervenidas	Areas intervenidas	Eastern Cordillera real montane forests
Isimanchi	Areas intervenidas	Areas intervenidas	Eastern Cordillera real montane forests
Sizaplaya	Bosque montano pluvial de los Andes del Norte	CES409.110	Eastern Cordillera real montane forests
Sonaderos	Bosque siempreverde subandino del oeste de Amazonia	CES408.565	Eastern Cordillera real montane forests
Jatunyacu	Bosque siempreverde subandino del oeste de Amazonia	CES408.565	Eastern Cordillera real montane forests
Las Cidras	Areas intervenidas	Areas intervenidas	Eastern Cordillera real montane forests
Negro	Areas intervenidas	Areas intervenidas	Eastern Cordillera real montane forests
Quijos-Baeza	Bosque montano pluvial de las cordilleras subandinas orientales	CES409.913	Eastern Cordillera real montane forests
Delsitanisagua	Areas intervenidas	Areas intervenidas	Eastern Cordillera real montane forests
Lligua-Muyo	Areas intervenidas	Areas intervenidas	Eastern Cordillera real montane forests
El Retorno	Bosque montano bajo pluvial de los Andes del Norte	CES409.112	Eastern Cordillera real montane forests
Cedroyacu	Bosque montano bajo pluvial de los Andes del Norte	CES409.112	Eastern Cordillera real montane forests
Cardenillo	Bosque montano bajo pluvial de los Andes del Norte	CES409.112	Eastern Cordillera real montane forests
Sopladora	Areas intervenidas	Areas intervenidas	Eastern Cordillera real montane forests
Gualaquiza	Areas intervenidas	Areas intervenidas	Eastern Cordillera real montane forests
San Miguel	Areas intervenidas	Areas intervenidas	Napo moist forests
Catachi	Bosque siempreverde subandino del oeste de Amazonia	CES408.565	Eastern Cordillera real montane forests
San Antonio	Areas intervenidas	Areas intervenidas	Napo moist forests
Zamora Salto 2	Areas intervenidas	Areas intervenidas	Napo moist forests
Zamora Salto 1	Areas intervenidas	Areas intervenidas	Napo moist forests
Zamora Salto 3	Bosque siempreverde subandino del oeste de Amazonia	CES408.565	Napo moist forests
Zamora San Juan Bosco	Areas intervenidas	Areas intervenidas	Eastern Cordillera real montane forests
Naiza	Bosque siempreverde subandino del oeste de la Amazonia	CES408.565	Napo moist forests
Verdeyacu Chico	Bosque siempreverde subandino del oeste de Amazonia	CES408.565	Eastern Cordillera real montane forests
Coca Codo Sinclair	Bosque montano pluvial de las cordilleras subandinas orientales	CES409.913	Eastern Cordillera real montane forests
Santa Catalina	Bosque siempreverde subandino del oeste de Amazonia	CES408.565	Ucayali moist forests
COLPA	Vegetacion ribereña basimontana de Yungas	CES409.065	Peruvian Yungas
NARANJOS II	Bosque y palmar basimontano pluvial de Yungas	CES409.048	Peruvian Yungas
Huasahuasi I	Bosque montano pluviestacional subhumedo de Yungas	CES409.921	Peruvian Yungas
Huasahuasi II	Pajonal arbustivo altoandino y altimontano pluvial de Yungas	CES409.058	Peruvian Yungas
Pias	Bosque y arbustal basimontano xerico de Yungas del norte	CES409.079	Marañón dry forests
CARCAPATA III - RER	Bosque montano pluvial de Yungas	CES409.050	Peruvian Yungas
LAS ORQUIDEAS 1	Bosque siempreverde subandino del oeste de Amazonia	CES408.565	Peruvian Yungas
Pias II	Bosque y arbustal basimontano xerico de Yungas del norte	CES409.079	Marañón dry forests
TULPAC - PALENQUE	Bosque y arbustal basimontano xerico de Yungas del norte	CES409.079	Marañón dry forests
Ayna	Bosque siempreverde subandino del suroeste de Amazonia	CES408.543	Peruvian Yungas
RenovAndes H1	Areas intervenidas	Areas intervenidas	Southwest Amazon moist forests
CENTAURO I-III	Areas intervenidas	Areas intervenidas	Central Andean wet puna
SANTA FORTUNATA	Bosque montano pluviestacional humedo de Yungas	CES409.051	Peruvian Yungas
UCHUHUERTA	Areas intervenidas	Areas intervenidas	Peruvian Yungas
LAS JOYAS	Bosque y arbustal basimontano xerico de Yungas del norte	CES409.079	Peruvian Yungas
LA VIRGEN	Areas intervenidas	Areas intervenidas	Peruvian Yungas
TRASVASE LAVASEN QUISHUAR	Areas intervenidas	Areas intervenidas	Peruvian Yungas
Pucara II	Pajonales y matorrales altimontanos de la Puna humeda	CES409.087	Peruvian Yungas
Pumayacu Cachiyacu	Areas intervenidas	Areas intervenidas	Ucayali moist forests
SANTA TERESA	Bosque basimontano pluviestacional subhumedo de Yungas del sur	CES409.053	Peruvian Yungas
MARAÑON	Pajonales y matorrales altimontanos de la Puna humeda	CES409.087	Peruvian Yungas
PACOBAMBA	Matorral xerico interandino de Yungas	CES409.057	Peruvian Yungas
OREJA DE PERRO I	Matorral xerico interandino de Yungas	CES409.057	Peruvian Yungas
EL CAÑO	Areas intervenidas	Areas intervenidas	Peruvian Yungas
SAN GABAN III	Bosque siempreverde subandino del suroeste de Amazonia	CES408.543	Southwest Amazon moist forests
Mayo II	Areas intervenidas	Areas intervenidas	Ucayali moist forests
Angel I	Bosque montano pluvial de Yungas	CES409.050	Peruvian Yungas
Mayo I	Bosque siempreverde subandino del oeste de Amazonia	CES408.565	Ucayali moist forests
Angel II	Bosque montano pluvial de Yungas	CES409.050	Peruvian Yungas
Angel III	Areas intervenidas	Areas intervenidas	Peruvian Yungas
San Jose	Bosque y palmar basimontano pluvial de Yungas	CES409.048	Bolivian Yungas
SAN GABAN IV	Bosque montano pluvial de Yungas	CES409.050	Peruvian Yungas
Puchca	Bosque montano pluviestacional subhumedo de Yungas	CES409.921	Peruvian Yungas
PUCARA	Pajonales y matorrales altimontanos de la Puna humeda	CES409.087	Central Andean wet puna
SAN GABAN 1	Bosque montano pluvial de Yungas	CES409.050	Peruvian Yungas
MAZAN	Areas Intervenidas	100	Napo moist forests
Yanamayo	Bosque y arbustal basimontano xerico de Yungas del norte	CES409.079	Peruvian Yungas
CURIBAMBA	Bosque basimontano pluviestacional humedo de Yungas	CES409.054	Peruvian Yungas
BELO HORIZONTE	Areas intervenidas	Areas intervenidas	Ucayali moist forests
RETAMAL	Bosque montano pluviestacional subhumedo de Yungas	CES409.921	Peruvian Yungas
Llata 2	Bosque montano pluviestacional subhumedo de Yungas	CES409.921	Peruvian Yungas
Llata 1	Bosque montano pluviestacional subhumedo de Yungas	CES409.921	Peruvian Yungas
Pulpería	Matorral xerico interandino de Yungas	CES409.057	Peruvian Yungas
Chusgón	Bosque y arbustal basimontano xerico de Yungas del norte	CES409.079	Marañón dry forests
Patas 2	Bosque y arbustal basimontano xerico de Yungas del norte	CES409.079	Peruvian Yungas
Man 270	Matorral xerico interandino de Yungas	CES409.057	Peruvian Yungas
Bolívar	Bosque y arbustal basimontano xerico de Yungas del norte	CES409.079	Marañón dry forests
Rupac	Bosque y arbustal basimontano xerico de Yungas del norte	CES409.079	Peruvian Yungas
Pauya-Cushabatay	Bosque del piedemonte del oeste de la Amazonia	CES408.572	Ucayali moist forests
SANDIA INA 30-INA 40	Bosque siempreverde subandino del suroeste de Amazonia	CES408.543	Bolivian Yungas
Patas 1	Bosque y arbustal basimontano xerico de Yungas del norte	CES409.079	Marañón dry forests
ILLAPANI	Bosque siempreverde subandino del suroeste de Amazonia	CES408.543	Peruvian Yungas
Yangas	Bosque y arbustal basimontano xerico de Yungas del norte	CES409.079	Marañón dry forests
Santa Rosa	Bosque y arbustal basimontano xerico de Yungas del norte	CES409.079	Marañón dry forests
OREJA DE PERRO	Matorral xerico interandino de Yungas	CES409.057	Peruvian Yungas
Pión	Bosque y arbustal basimontano xerico de Yungas del norte	CES409.079	Marañón dry forests
CHAGLLA	Bosque siempreverde subandino del oeste de Amazonia	CES408.565	Peruvian Yungas
INA 65-88-90	Bosque siempreverde subandino del suroeste de Amazonia	CES408.543	Southwest Amazon moist forests
San Pablo	Matorral xerico interandino de Yungas	CES409.057	Marañón dry forests
M3-CERRO EL AGUILA	Matorral xerico interandino de Yungas	CES409.057	Peruvian Yungas
Tambo 60	Areas intervenidas	Areas intervenidas	Southwest Amazon moist forests
CHADIN 2	Bosque y arbustal basimontano xerico de Yungas del norte	CES409.079	Marañón dry forests
DEL NORTE	Bosque y arbustal basimontano xerico de Yungas del norte	CES409.079	Marañón dry forests
TAMBO- PUERTO PRADO	Areas intervenidas	Areas intervenidas	Southwest Amazon moist forests
VERACRUZ	Bosque y arbustal basimontano xerico de Yungas del norte	CES409.079	Marañón dry forests
SANTA MARIA	Matorral xerico interandino de Yungas	CES409.057	Peruvian Yungas
Vizcatán	Bosque siempreverde subandino del suroeste de Amazonia	CES408.543	Peruvian Yungas
Pongo de Aguirre	Bosque siempreverde subandino del oeste de Amazonia	CES408.565	Ucayali moist forests
Cuquipampa	Bosque basimontano xerico de Yungas del sur	CES409.056	Peruvian Yungas
CUMBA 4	Bosque y arbustal basimontano xerico de Yungas del norte	CES409.079	Marañón dry forests
Balsas	Bosque y arbustal basimontano xerico de Yungas del norte	CES409.079	Marañón dry forests
Sumabeni	Complejo de vegetación sucesional riparia de aguas blancas de la Amazonía	CES408.550	Southwest Amazon moist forests
TAM40	Areas intervenidas	Areas intervenidas	Southwest Amazon moist forests
PAQUITZAPANGO	Bosque basimontano pluviestacional subhumedo de Yungas del sur	CES409.053	Southwest Amazon moist forests
Inambari	Bosque siempreverde subandino del suroeste de Amazonia	CES408.543	Southwest Amazon moist forests
Rentema	Areas intervenidas	Areas intervenidas	Eastern Cordillera real montane forests
MAINIQUE (Urubamba)	Bosque siempreverde subandino del suroeste de Amazonia	CES408.543	Southwest Amazon moist forests
Escuprebraga	Bosque siempreverde subandino del oeste de Amazonia	CES408.565	Ucayali moist forests
PONGO DE MANSERICHE	Areas intervenidas	Areas intervenidas	Ucayali moist forests
